# Supplementary material for: Efficacy and safety of CT-P6 versus reference trastuzumab in HER2-positive early breast cancer: updated results of a randomised phase 3 trial
Source: Springer Nature journal article supplement (doi:10.1007/s00280-019-03920-4), 2019-08-19
Supplement: MOESM2 [file 17082530]

**Supplementary materials for:** Efficacy and safety of CT-P6 versus reference trastuzumab in  
HER2-positive early breast cancer: updated results of a randomised phase 3 trial

F.J. Esteva, Y.V. Baranau, V. Baryash, A. Manikhas, V. Moiseyenko, G. Dzagnidze, E.  
Zhavrid, D. Boliukh, D. Stroyakovskiy, J. Pikiel, A.E. Eniu, R.K. Li, A.V. Rusyn, B.  
Tiangco, S.J. Lee, S. Young Lee, S.Y. Yu and J. Stebbing\*

\*Corresponding author: Justin Stebbing; Division of Cancer, Imperial Centre for  
Translational and Experimental Medicine, London, UK; Imperial College Healthcare NHS  
Trust, Charing Cross Hospital, Fulham Palace Road, London, W6 8RF, UK

Email address: [j.stebbing@imperial.ac.uk](mailto:j.stebbing@imperial.ac.uk).

**Online Resource 2: Supplementary Tables**

**Table S1** Baseline patient characteristics (per-protocol set)

| <b>Characteristic</b>               | <b>CT-P6<br/>(N=248)</b> | <b>Trastuzumab<br/>(N=256)</b> |
|-------------------------------------|--------------------------|--------------------------------|
| Age (years)                         |                          |                                |
| Mean (SD)                           | 51.8 (10.86)             | 51.9 (10.19)                   |
| Median (range)                      | 53 (28–78)               | 52 (24–74)                     |
| Race                                |                          |                                |
| Asian                               | 48 (19.4)                | 44 (17.2)                      |
| Black or African American           | 1 (0.4)                  | 4 (1.6)                        |
| Hispanic or Latino                  | 9 (3.6)                  | 8 (3.1)                        |
| White                               | 189 (76.2)               | 198 (77.3)                     |
| Other <sup>1</sup>                  | 1 (0.4)                  | 2 (0.8)                        |
| Weight (kg)                         |                          |                                |
| Mean (SD)                           | 69.8 (14.93)             | 71.0 (14.59)                   |
| Median (range)                      | 68.0 (44.0–124.0)        | 69.9 (43.4–120.0)              |
| Region                              |                          |                                |
| EMEA                                | 188 (75.8)               | 203 (79.3)                     |
| America                             | 12 (4.8)                 | 10 (3.9)                       |
| Asia                                | 48 (19.4)                | 43 (16.8)                      |
| ECOG performance status (screening) |                          |                                |
| 0                                   | 218 (87.9)               | 231 (90.2)                     |
| 1                                   | 30 (12.1)                | 25 (9.8)                       |
| Clinical stage <sup>2</sup>         |                          |                                |
| I                                   | 20 (8.1)                 | 30 (11.7)                      |
| IIA                                 | 69 (27.8)                | 78 (30.5)                      |
| IIB                                 | 101 (40.7)               | 94 (36.7)                      |
| IIIA                                | 58 (23.4)                | 54 (21.1)                      |
| Hormone receptor status             |                          |                                |
| Positive                            | 149 (60.1)               | 150 (58.6)                     |
| Negative                            | 99 (39.9)                | 106 (41.4)                     |
| LVEF                                |                          |                                |
| Median (range)                      | 66.0 (55.2–83.0)         | 65.7 (55.0–79.0) <sup>3</sup>  |

<sup>1</sup>Includes one patient in the trastuzumab group for whom race could not be recorded due to local regulations

<sup>2</sup>Patients with stage IIIB, IIIC, IV disease were excluded from the PPS

<sup>3</sup>n=255 (one patient missed LVEF assessment at screening; however, there was no significant LVEF decrease during the neoadjuvant or adjuvant treatment periods)

ECOG=Eastern Cooperative Oncology Group; EMEA=Europe, Middle East, and Africa;

LVEF=left ventricular ejection fraction; PPS=per-protocol set; SD=standard deviation

**Table S2** Summary of post-surgery radiotherapy and hormonal therapy (per-protocol set)

|                                                | <b>CT-P6<br/>(N=248)</b> | <b>Trastuzumab<br/>(N=256)</b> |
|------------------------------------------------|--------------------------|--------------------------------|
| Patients with surgery, n (%)                   | 248 (100)                | 256 (100)                      |
| Patients with $\geq 1$ RT, n (%)               | 138 (55.6)               | 129 (50.4)                     |
| Breast only                                    | 59 (23.8)                | 59 (23.0)                      |
| Breast + axilla only                           | 7 (2.8)                  | 15 (5.9)                       |
| Breast + SCV/IMC/Other $\pm$ axilla            | 54 (21.8)                | 47 (18.4)                      |
| Breast + other $\pm$ axilla                    | 13 (5.2)                 | 9 (3.5)                        |
| Breast + axilla + SCV $\pm$ other              | 24 (9.7)                 | 19 (7.4)                       |
| Breast + axilla + SCV + IMC $\pm$ other        | 3 (1.2)                  | 3 (1.2)                        |
| Breast + SCV + IMC $\pm$ other                 | 1 (0.4)                  | 2 (0.8)                        |
| Other <sup>1</sup>                             | 18 (7.3)                 | 8 (3.1)                        |
| Patients with $\geq 1$ hormonal therapy, n (%) | 99 (39.9)                | 97 (37.9)                      |
| Anastrozole                                    | 23 (9.3)                 | 20 (7.8)                       |
| Exemestane                                     | 0                        | 2 (0.8)                        |
| Letrozole                                      | 17 (6.9)                 | 20 (7.8)                       |
| Tamoxifen                                      | 60 (24.2)                | 54 (21.1)                      |
| Toremifene                                     | 2 (0.8)                  | 1 (0.4)                        |
| Goserelin                                      | 13 (5.2)                 | 8 (3.1)                        |
| Leuprorelin acetate                            | 1 (0.4)                  | 1 (0.4)                        |

Note: The denominator for percentage was the number of patients who had breast surgery during the neoadjuvant period in the PPS population

<sup>1</sup>Includes all other region combinations not shown in the preceding list

IMC=internal mammary chain; PPS=per-protocol set; RT=radiotherapy;

SCV=supraclavicular

**Table S3** Safety data for the adjuvant period only (safety population)

|                                                                          | <b>CT-P6<br/>(N=271)</b> | <b>Trastuzumab<br/>(N=278)</b> |
|--------------------------------------------------------------------------|--------------------------|--------------------------------|
| Overview of TEAEs                                                        |                          |                                |
| Total number of TEAEs                                                    | 450                      | 470                            |
| Patients experiencing $\geq 1$ TEAEs                                     | 139 (51.3)               | 147 (52.9)                     |
| Grade 1 or 2                                                             | 130 (48.0)               | 131 (47.1)                     |
| Grade $\geq 3$                                                           | 9 (3.3)                  | 16 (5.8)                       |
| Treatment-related <sup>1</sup>                                           | 50 (18.5)                | 63 (22.7)                      |
| Total number of treatment-emergent SAEs                                  | 3                        | 14                             |
| Patients experiencing $\geq 1$ treatment-emergent SAEs                   | 3 (1.1)                  | 12 (4.3)                       |
| Grade 1 or 2                                                             | 1 (0.4)                  | 3 (1.1)                        |
| Grade $\geq 3$                                                           | 2 (0.7)                  | 9 (3.2)                        |
| Treatment-related                                                        | 1 (0.4)                  | 1 (0.4)                        |
| TEAEs leading to discontinuation                                         | 2 (0.7)                  | 3 (1.1)                        |
| TEAEs leading to death                                                   | 0                        | 1 (0.4)                        |
| TEAEs of special interest                                                |                          |                                |
| Cardiac disorders                                                        | 10 (3.7)                 | 13 (4.7)                       |
| Treatment-related                                                        | 5 (1.8)                  | 8 (2.9)                        |
| Infusion-related reactions                                               | 11 (4.1)                 | 5 (1.8)                        |
| Treatment-related                                                        | 11 (4.1)                 | 5 (1.8)                        |
| Treatment-related TEAEs reported in $\geq 3\%$ of either treatment group |                          |                                |
| Alanine aminotransferase increased                                       | 0                        | 9 (3.2)                        |
| Anaemia                                                                  | 7 (2.6)                  | 11 (4.0)                       |
| Aspartate aminotransferase increased                                     | 0                        | 9 (3.2)                        |
| Asthenia                                                                 | 8 (3.0)                  | 5 (1.8)                        |
| Ejection fraction decreased                                              | 11 (4.1)                 | 4 (1.4)                        |
| Infusion-related reaction                                                | 11 (4.1)                 | 5 (1.8)                        |
| Neutropenia                                                              | 4 (1.5)                  | 10 (3.6)                       |

Note: Data are n or n (%). The total number of TEAEs count included all patient events. At each level of summarisation, a patient was counted once if the patient reported one or more events. Only the most severe event is counted

<sup>1</sup>TEAEs were considered to be related to study drug if the relationship was defined as ‘possible’, ‘probable’ or ‘definite’

SAE=severe adverse event; TEAE=treatment-emergent adverse event

**Table S4** Summary of left ventricular ejection fraction measurements up to the end of the adjuvant period<sup>1</sup> (safety population)

|                                                         | <b>CT-P6<br/>(N=271)</b> | <b>Trastuzumab<br/>(N=278)</b> |
|---------------------------------------------------------|--------------------------|--------------------------------|
| LVEF at baseline                                        |                          |                                |
| n                                                       | 271                      | 277                            |
| Median (range)                                          | 66.0 (55.0–83.0)         | 66.0 (55.0–79.0)               |
| LVEF after neoadjuvant period cycle 4                   |                          |                                |
| n                                                       | 262                      | 263                            |
| Median (range)                                          | 65.0 (38.0–80.0)         | 65.0 (42.0–85.0)               |
| LVEF at end of neoadjuvant period                       |                          |                                |
| n                                                       | 266                      | 268                            |
| Median (range)                                          | 64.0 (44.0–82.0)         | 64.0 (44.0–78.0)               |
| LVEF before adjuvant period cycle 1                     |                          |                                |
| n                                                       | 225                      | 226                            |
| Median (range)                                          | 64.0 (52.0–80.0)         | 64.0 (51.9–85.0)               |
| LVEF after adjuvant period cycle 3                      |                          |                                |
| n                                                       | 229                      | 235                            |
| Median (range)                                          | 63.0 (49.0–85.0)         | 63.1 (43.1–84.0)               |
| LVEF after adjuvant period cycle 6                      |                          |                                |
| n                                                       | 235                      | 237                            |
| Median (range)                                          | 63.0 (43.0–77.0)         | 64.0 (44.0–79.0)               |
| LVEF at end of adjuvant period                          |                          |                                |
| n                                                       | 244                      | 258                            |
| Median (range)                                          | 63.0 (44.0–78.2)         | 64.0 (33.0–78.0)               |
| Overall worst LVEF value <sup>2</sup>                   |                          |                                |
| n                                                       | 267                      | 272                            |
| Median (range)                                          | 60.0 (38.0–70.0)         | 60.0 (30.0–76.0)               |
| LVEF <50 and decrease of $\geq 10$ from baseline, n (%) | 9 (3.3)                  | 7 (2.5)                        |

<sup>1</sup>Includes neoadjuvant period, surgery, and adjuvant period or at least one year (including follow-up) from the first administration of study drug in the neoadjuvant period in patients who discontinued treatment early without completing the adjuvant phase

<sup>2</sup>The overall worst LVEF value for a patient was the lowest post-baseline LVEF value

LVEF=left ventricular ejection fraction
